# Supplementary material
Source: publisher figshare collection journal article supplement (https://acs.figshare.com/ndownloader/files/4615195)
Supplement: Supplementary file 1 [file 4615195]

 
data_z:\xraydata\peter\06srv303\work\xs 
 
_audit_creation_method            SHELXL-97 
_chemical_name_systematic 
; 
 ? 
; 
_chemical_name_common             ? 
_chemical_melting_point           ? 
_chemical_formula_moiety          'C16 H20 N6 O2' 
_chemical_formula_sum 
 'C16 H20 N6 O2' 
_chemical_formula_weight          328.38 
 
loop_ 
 _atom_type_symbol 
 _atom_type_description 
 _atom_type_scat_dispersion_real 
 _atom_type_scat_dispersion_imag 
 _atom_type_scat_source 
 'C'  'C'   0.0033   0.0016 
 'International Tables Vol C Tables 4.2.6.8 and 6.1.1.4' 
 'H'  'H'   0.0000   0.0000 
 'International Tables Vol C Tables 4.2.6.8 and 6.1.1.4' 
 'N'  'N'   0.0061   0.0033 
 'International Tables Vol C Tables 4.2.6.8 and 6.1.1.4' 
 'O'  'O'   0.0106   0.0060 
 'International Tables Vol C Tables 4.2.6.8 and 6.1.1.4' 
 
_symmetry_cell_setting            'Triclinic' 
_symmetry_space_group_name_H-M    'P-1' 
 
loop_ 
 _symmetry_equiv_pos_as_xyz 
 'x, y, z' 
 '-x, -y, -z' 
 
_cell_length_a                    6.244(4) 
_cell_length_b                    7.169(4) 
_cell_length_c                    17.566(11) 
_cell_angle_alpha                 79.026(11) 
_cell_angle_beta                  87.000(11) 
_cell_angle_gamma                 88.644(10) 
_cell_volume                      770.7(8) 
_cell_formula_units_Z             2 
_cell_measurement_temperature     393(2) 
_cell_measurement_reflns_used     880 
_cell_measurement_theta_min       2.912 
_cell_measurement_theta_max       28.958  
 
_exptl_crystal_description        'plate' 
_exptl_crystal_colour             'colourless' 
_exptl_crystal_size_max           0.34 
_exptl_crystal_size_mid           0.23 
_exptl_crystal_size_min           0.10 
_exptl_crystal_density_meas       ? 
_exptl_crystal_density_diffrn     1.415 
_exptl_crystal_density_method     'not measured' 
_exptl_crystal_F_000              348 
_exptl_absorpt_coefficient_mu     0.098 
_exptl_absorpt_correction_type    'none'
_exptl_absorpt_correction_T_min   ?
_exptl_absorpt_correction_T_max   ?
_exptl_absorpt_process_details    ?
 
_exptl_special_details 
; 
 ? 
; 
 
_diffrn_ambient_temperature       393(2) 
_diffrn_radiation_wavelength      0.71073 
_diffrn_radiation_type            MoK\a 
_diffrn_radiation_source          'fine-focus sealed tube' 
_diffrn_radiation_monochromator   graphite 
_diffrn_measurement_device_type   'Smart 6K' 
_diffrn_measurement_method        ? 
_diffrn_detector_area_resol_mean  ? 
_diffrn_standards_number          0 
_diffrn_standards_interval_count  ? 
_diffrn_standards_interval_time   ? 
_diffrn_standards_decay_%         ? 
_diffrn_reflns_number             5407 
_diffrn_reflns_av_R_equivalents   0.0325 
_diffrn_reflns_av_sigmaI/netI     0.0441 
_diffrn_reflns_limit_h_min        -7 
_diffrn_reflns_limit_h_max        7 
_diffrn_reflns_limit_k_min        -8 
_diffrn_reflns_limit_k_max        8 
_diffrn_reflns_limit_l_min        -18 
_diffrn_reflns_limit_l_max        20 
_diffrn_reflns_theta_min          1.18 
_diffrn_reflns_theta_max          24.99 
_reflns_number_total              2690 
_reflns_number_gt                 2347 
_reflns_threshold_expression      >2sigma(I) 
 
_computing_data_collection        'Smart'
_computing_cell_refinement        'Saint'
_computing_data_reduction         'Saint' 
_computing_structure_solution     'SHELXS-97 (Sheldrick, 1990)' 
_computing_structure_refinement   'SHELXL-97 (Sheldrick, 1997)' 
_computing_molecular_graphics     'Xseed' 
_computing_publication_material   'Xseed' 
 
_refine_special_details 
; 
 Refinement of F^2^ against ALL reflections.  The weighted R-factor wR and 
 goodness of fit S are based on F^2^, conventional R-factors R are based 
 on F, with F set to zero for negative F^2^. The threshold expression of 
 F^2^ > 2sigma(F^2^) is used only for calculating R-factors(gt) etc. and is 
 not relevant to the choice of reflections for refinement.  R-factors based 
 on F^2^ are statistically about twice as large as those based on F, and R- 
 factors based on ALL data will be even larger. 
; 
 
_refine_ls_structure_factor_coef  Fsqd  
_refine_ls_matrix_type            full 
_refine_ls_weighting_scheme       calc  
_refine_ls_weighting_details 
 'calc w=1/[\s^2^(Fo^2^)+(0.0674P)^2^+1.4740P] where P=(Fo^2^+2Fc^2^)/3' 
_atom_sites_solution_primary      direct 
_atom_sites_solution_secondary    difmap 
_atom_sites_solution_hydrogens    geom 
_refine_ls_hydrogen_treatment     constr 
_refine_ls_extinction_method      none 
_refine_ls_extinction_coef        ? 
_refine_ls_number_reflns          2690 
_refine_ls_number_parameters      217 
_refine_ls_number_restraints      0 
_refine_ls_R_factor_all           0.0877 
_refine_ls_R_factor_gt            0.0762 
_refine_ls_wR_factor_ref          0.1926 
_refine_ls_wR_factor_gt           0.1865 
_refine_ls_goodness_of_fit_ref    1.257 
_refine_ls_restrained_S_all       1.257 
_refine_ls_shift/su_max           0.000 
_refine_ls_shift/su_mean          0.000 
 
loop_ 
 _atom_site_label 
 _atom_site_type_symbol 
 _atom_site_fract_x 
 _atom_site_fract_y 
 _atom_site_fract_z 
 _atom_site_U_iso_or_equiv 
 _atom_site_adp_type 
 _atom_site_occupancy 
 _atom_site_symmetry_multiplicity 
 _atom_site_calc_flag 
 _atom_site_refinement_flags 
 _atom_site_disorder_assembly 
 _atom_site_disorder_group 
O1 O 0.7045(4) 0.8157(3) 0.34319(14) 0.0190(6) Uani 1 1 d . . . 
O2 O 1.8152(4) 0.6679(3) 0.68631(14) 0.0196(6) Uani 1 1 d . . . 
N1 N 0.6222(5) 0.5588(4) 0.08593(18) 0.0254(7) Uani 1 1 d . . . 
N2 N 0.8376(4) 0.5972(4) 0.27157(17) 0.0171(6) Uani 1 1 d . . . 
H2N H 0.9351 0.5108 0.2705 0.021 Uiso 1 1 calc R . . 
N3 N 1.0219(4) 0.6658(4) 0.37222(17) 0.0199(7) Uani 1 1 d . . . 
H3N H 1.1149 0.5820 0.3625 0.024 Uiso 1 1 calc R . . 
N4 N 1.4940(4) 0.8104(4) 0.65732(17) 0.0181(7) Uani 1 1 d . . . 
H4N H 1.3957 0.8886 0.6682 0.022 Uiso 1 1 calc R . . 
N5 N 1.6462(4) 0.8432(4) 0.76931(17) 0.0177(7) Uani 1 1 d . . . 
H5N H 1.5250 0.8906 0.7823 0.021 Uiso 1 1 calc R . . 
N6 N 2.1925(4) 0.9064(4) 0.82918(18) 0.0194(7) Uani 1 1 d . . . 
C1 C 0.4219(6) 0.6306(5) 0.0939(2) 0.0241(8) Uani 1 1 d . . . 
H1 H 0.3297 0.6346 0.0537 0.029 Uiso 1 1 calc R . . 
C2 C 0.3484(6) 0.6983(5) 0.1591(2) 0.0219(8) Uani 1 1 d . . . 
H2 H 0.2098 0.7478 0.1618 0.026 Uiso 1 1 calc R . . 
C3 C 0.4798(5) 0.6928(5) 0.2205(2) 0.0189(8) Uani 1 1 d . . . 
H3 H 0.4319 0.7380 0.2647 0.023 Uiso 1 1 calc R . . 
C4 C 0.6875(5) 0.6171(4) 0.2140(2) 0.0153(7) Uani 1 1 d . . . 
C5 C 0.7486(5) 0.5552(5) 0.1451(2) 0.0190(8) Uani 1 1 d . . . 
H5 H 0.8877 0.5081 0.1402 0.023 Uiso 1 1 calc R . . 
C6 C 0.8457(5) 0.7004(5) 0.32948(19) 0.0152(7) Uani 1 1 d . . . 
C7 C 1.0555(5) 0.7685(5) 0.4341(2) 0.0183(8) Uani 1 1 d . . . 
H7A H 0.9315 0.7536 0.4703 0.022 Uiso 1 1 calc R . . 
H7B H 1.0699 0.9028 0.4123 0.022 Uiso 1 1 calc R . . 
C8 C 1.2548(5) 0.6972(5) 0.4772(2) 0.0178(8) Uani 1 1 d . . . 
H8A H 1.3803 0.7226 0.4421 0.021 Uiso 1 1 calc R . . 
H8B H 1.2462 0.5608 0.4950 0.021 Uiso 1 1 calc R . . 
C9 C 1.2781(5) 0.7930(5) 0.5463(2) 0.0173(8) Uani 1 1 d . . . 
H9A H 1.2851 0.9295 0.5285 0.021 Uiso 1 1 calc R . . 
H9B H 1.1530 0.7667 0.5815 0.021 Uiso 1 1 calc R . . 
C10 C 1.4779(5) 0.7241(5) 0.5894(2) 0.0168(7) Uani 1 1 d . . . 
H10B H 1.4741 0.5870 0.6053 0.020 Uiso 1 1 calc R . . 
H10A H 1.6037 0.7555 0.5548 0.020 Uiso 1 1 calc R . . 
C11 C 1.6605(5) 0.7694(5) 0.7032(2) 0.0150(7) Uani 1 1 d . . . 
C12 C 2.1554(6) 0.8785(5) 0.9065(2) 0.0207(8) Uani 1 1 d . . . 
H12 H 2.2688 0.8927 0.9371 0.025 Uiso 1 1 calc R . . 
C13 C 1.9563(5) 0.8295(5) 0.9432(2) 0.0189(8) Uani 1 1 d . . . 
H13 H 1.9378 0.8092 0.9970 0.023 Uiso 1 1 calc R . . 
C14 C 1.7866(5) 0.8116(5) 0.8977(2) 0.0185(8) Uani 1 1 d . . . 
H14 H 1.6522 0.7769 0.9206 0.022 Uiso 1 1 calc R . . 
C15 C 1.8191(5) 0.8460(5) 0.8176(2) 0.0166(7) Uani 1 1 d . . . 
C16 C 2.0257(5) 0.8908(5) 0.7863(2) 0.0165(7) Uani 1 1 d . . . 
H16 H 2.0484 0.9109 0.7327 0.020 Uiso 1 1 calc R . . 
 
loop_ 
 _atom_site_aniso_label 
 _atom_site_aniso_U_11 
 _atom_site_aniso_U_22 
 _atom_site_aniso_U_33 
 _atom_site_aniso_U_23 
 _atom_site_aniso_U_13 
 _atom_site_aniso_U_12 
O1 0.0169(12) 0.0159(12) 0.0251(14) -0.0068(10) -0.0028(10) 0.0126(10) 
O2 0.0167(12) 0.0155(12) 0.0280(14) -0.0086(10) -0.0042(10) 0.0130(10) 
N1 0.0264(17) 0.0240(17) 0.0256(17) -0.0043(13) -0.0048(13) 0.0067(13) 
N2 0.0157(14) 0.0139(14) 0.0233(16) -0.0073(12) -0.0066(12) 0.0112(11) 
N3 0.0184(15) 0.0193(16) 0.0248(16) -0.0113(13) -0.0063(12) 0.0137(12) 
N4 0.0134(14) 0.0184(15) 0.0251(16) -0.0110(12) -0.0058(12) 0.0121(11) 
N5 0.0129(14) 0.0194(15) 0.0230(16) -0.0105(12) -0.0024(12) 0.0095(11) 
N6 0.0144(14) 0.0168(15) 0.0281(17) -0.0074(13) -0.0039(12) 0.0051(11) 
C1 0.0238(19) 0.0194(19) 0.029(2) -0.0012(15) -0.0135(16) 0.0020(15) 
C2 0.0158(17) 0.0126(17) 0.038(2) -0.0040(15) -0.0098(15) 0.0064(13) 
C3 0.0180(17) 0.0119(17) 0.027(2) -0.0053(14) -0.0012(14) 0.0049(13) 
C4 0.0155(16) 0.0063(15) 0.0240(18) -0.0020(13) -0.0041(14) 0.0037(12) 
C5 0.0175(17) 0.0178(18) 0.0213(19) -0.0034(14) -0.0019(14) 0.0054(14) 
C6 0.0145(16) 0.0099(16) 0.0210(18) -0.0028(13) -0.0013(13) 0.0034(13) 
C7 0.0174(17) 0.0155(17) 0.0232(19) -0.0074(14) -0.0037(14) 0.0089(13) 
C8 0.0179(17) 0.0149(17) 0.0203(18) -0.0032(14) -0.0019(14) 0.0106(14) 
C9 0.0155(17) 0.0131(17) 0.0231(19) -0.0032(14) -0.0026(14) 0.0072(13) 
C10 0.0169(17) 0.0137(16) 0.0206(18) -0.0060(13) -0.0013(14) 0.0073(13) 
C11 0.0116(16) 0.0096(16) 0.0242(19) -0.0044(14) -0.0009(13) 0.0020(12) 
C12 0.0177(17) 0.0177(18) 0.028(2) -0.0084(15) -0.0046(15) 0.0051(14) 
C13 0.0208(18) 0.0156(17) 0.0213(19) -0.0061(14) -0.0015(14) 0.0045(14) 
C14 0.0143(16) 0.0173(18) 0.0244(19) -0.0068(14) 0.0013(14) 0.0056(13) 
C15 0.0127(16) 0.0111(16) 0.0272(19) -0.0070(14) -0.0027(14) 0.0090(13) 
C16 0.0178(17) 0.0100(16) 0.0224(18) -0.0048(13) -0.0021(14) 0.0048(13) 
 
_geom_special_details 
; 
 All esds (except the esd in the dihedral angle between two l.s. planes) 
 are estimated using the full covariance matrix.  The cell esds are taken 
 into account individually in the estimation of esds in distances, angles 
 and torsion angles; correlations between esds in cell parameters are only 
 used when they are defined by crystal symmetry.  An approximate (isotropic) 
 treatment of cell esds is used for estimating esds involving l.s. planes. 
; 
 
loop_ 
 _geom_bond_atom_site_label_1 
 _geom_bond_atom_site_label_2 
 _geom_bond_distance 
 _geom_bond_site_symmetry_2 
 _geom_bond_publ_flag 
O1 C6 1.240(4) . ? 
O2 C11 1.253(4) . ? 
N1 C5 1.334(5) . ? 
N1 C1 1.352(5) . ? 
N2 C6 1.371(4) . ? 
N2 C4 1.400(4) . ? 
N2 H2N 0.8600 . ? 
N3 C6 1.356(4) . ? 
N3 C7 1.450(4) . ? 
N3 H3N 0.8600 . ? 
N4 C11 1.342(4) . ? 
N4 C10 1.454(4) . ? 
N4 H4N 0.8600 . ? 
N5 C11 1.363(4) . ? 
N5 C15 1.411(4) . ? 
N5 H5N 0.8600 . ? 
N6 C16 1.335(4) . ? 
N6 C12 1.343(5) . ? 
C1 C2 1.380(5) . ? 
C1 H1 0.9300 . ? 
C2 C3 1.382(5) . ? 
C2 H2 0.9300 . ? 
C3 C4 1.402(5) . ? 
C3 H3 0.9300 . ? 
C4 C5 1.397(5) . ? 
C5 H5 0.9300 . ? 
C7 C8 1.518(5) . ? 
C7 H7A 0.9700 . ? 
C7 H7B 0.9700 . ? 
C8 C9 1.519(5) . ? 
C8 H8A 0.9700 . ? 
C8 H8B 0.9700 . ? 
C9 C10 1.516(5) . ? 
C9 H9A 0.9700 . ? 
C9 H9B 0.9700 . ? 
C10 H10B 0.9700 . ? 
C10 H10A 0.9700 . ? 
C12 C13 1.391(5) . ? 
C12 H12 0.9300 . ? 
C13 C14 1.382(5) . ? 
C13 H13 0.9300 . ? 
C14 C15 1.386(5) . ? 
C14 H14 0.9300 . ? 
C15 C16 1.395(5) . ? 
C16 H16 0.9300 . ? 
 
loop_ 
 _geom_angle_atom_site_label_1 
 _geom_angle_atom_site_label_2 
 _geom_angle_atom_site_label_3 
 _geom_angle 
 _geom_angle_site_symmetry_1 
 _geom_angle_site_symmetry_3 
 _geom_angle_publ_flag 
C5 N1 C1 116.5(3) . . ? 
C6 N2 C4 127.0(3) . . ? 
C6 N2 H2N 116.5 . . ? 
C4 N2 H2N 116.5 . . ? 
C6 N3 C7 120.8(3) . . ? 
C6 N3 H3N 119.6 . . ? 
C7 N3 H3N 119.6 . . ? 
C11 N4 C10 120.7(3) . . ? 
C11 N4 H4N 119.7 . . ? 
C10 N4 H4N 119.7 . . ? 
C11 N5 C15 123.7(3) . . ? 
C11 N5 H5N 118.2 . . ? 
C15 N5 H5N 118.2 . . ? 
C16 N6 C12 117.1(3) . . ? 
N1 C1 C2 122.8(3) . . ? 
N1 C1 H1 118.6 . . ? 
C2 C1 H1 118.6 . . ? 
C1 C2 C3 120.3(3) . . ? 
C1 C2 H2 119.8 . . ? 
C3 C2 H2 119.8 . . ? 
C2 C3 C4 117.9(3) . . ? 
C2 C3 H3 121.0 . . ? 
C4 C3 H3 121.0 . . ? 
C5 C4 N2 117.6(3) . . ? 
C5 C4 C3 117.6(3) . . ? 
N2 C4 C3 124.9(3) . . ? 
N1 C5 C4 124.8(3) . . ? 
N1 C5 H5 117.6 . . ? 
C4 C5 H5 117.6 . . ? 
O1 C6 N3 121.6(3) . . ? 
O1 C6 N2 123.8(3) . . ? 
N3 C6 N2 114.6(3) . . ? 
N3 C7 C8 111.5(3) . . ? 
N3 C7 H7A 109.3 . . ? 
C8 C7 H7A 109.3 . . ? 
N3 C7 H7B 109.3 . . ? 
C8 C7 H7B 109.3 . . ? 
H7A C7 H7B 108.0 . . ? 
C7 C8 C9 111.2(3) . . ? 
C7 C8 H8A 109.4 . . ? 
C9 C8 H8A 109.4 . . ? 
C7 C8 H8B 109.4 . . ? 
C9 C8 H8B 109.4 . . ? 
H8A C8 H8B 108.0 . . ? 
C10 C9 C8 111.6(3) . . ? 
C10 C9 H9A 109.3 . . ? 
C8 C9 H9A 109.3 . . ? 
C10 C9 H9B 109.3 . . ? 
C8 C9 H9B 109.3 . . ? 
H9A C9 H9B 108.0 . . ? 
N4 C10 C9 111.2(3) . . ? 
N4 C10 H10B 109.4 . . ? 
C9 C10 H10B 109.4 . . ? 
N4 C10 H10A 109.4 . . ? 
C9 C10 H10A 109.4 . . ? 
H10B C10 H10A 108.0 . . ? 
O2 C11 N4 121.8(3) . . ? 
O2 C11 N5 123.1(3) . . ? 
N4 C11 N5 115.1(3) . . ? 
N6 C12 C13 123.5(3) . . ? 
N6 C12 H12 118.3 . . ? 
C13 C12 H12 118.3 . . ? 
C14 C13 C12 118.4(3) . . ? 
C14 C13 H13 120.8 . . ? 
C12 C13 H13 120.8 . . ? 
C13 C14 C15 119.3(3) . . ? 
C13 C14 H14 120.4 . . ? 
C15 C14 H14 120.4 . . ? 
C14 C15 C16 118.1(3) . . ? 
C14 C15 N5 120.7(3) . . ? 
C16 C15 N5 121.1(3) . . ? 
N6 C16 C15 123.6(3) . . ? 
N6 C16 H16 118.2 . . ? 
C15 C16 H16 118.2 . . ? 
 
loop_ 
 _geom_torsion_atom_site_label_1 
 _geom_torsion_atom_site_label_2 
 _geom_torsion_atom_site_label_3 
 _geom_torsion_atom_site_label_4 
 _geom_torsion 
 _geom_torsion_site_symmetry_1 
 _geom_torsion_site_symmetry_2 
 _geom_torsion_site_symmetry_3 
 _geom_torsion_site_symmetry_4 
 _geom_torsion_publ_flag 
C5 N1 C1 C2 0.2(5) . . . . ? 
N1 C1 C2 C3 -0.7(6) . . . . ? 
C1 C2 C3 C4 0.0(5) . . . . ? 
C6 N2 C4 C5 156.0(3) . . . . ? 
C6 N2 C4 C3 -24.7(5) . . . . ? 
C2 C3 C4 C5 1.1(5) . . . . ? 
C2 C3 C4 N2 -178.3(3) . . . . ? 
C1 N1 C5 C4 1.0(5) . . . . ? 
N2 C4 C5 N1 177.7(3) . . . . ? 
C3 C4 C5 N1 -1.6(5) . . . . ? 
C7 N3 C6 O1 -2.3(5) . . . . ? 
C7 N3 C6 N2 178.2(3) . . . . ? 
C4 N2 C6 O1 7.5(5) . . . . ? 
C4 N2 C6 N3 -173.0(3) . . . . ? 
C6 N3 C7 C8 176.2(3) . . . . ? 
N3 C7 C8 C9 -175.0(3) . . . . ? 
C7 C8 C9 C10 -179.5(3) . . . . ? 
C11 N4 C10 C9 -179.5(3) . . . . ? 
C8 C9 C10 N4 -177.5(3) . . . . ? 
C10 N4 C11 O2 5.5(5) . . . . ? 
C10 N4 C11 N5 -173.4(3) . . . . ? 
C15 N5 C11 O2 13.1(5) . . . . ? 
C15 N5 C11 N4 -168.0(3) . . . . ? 
C16 N6 C12 C13 2.0(5) . . . . ? 
N6 C12 C13 C14 -1.1(5) . . . . ? 
C12 C13 C14 C15 -1.1(5) . . . . ? 
C13 C14 C15 C16 2.3(5) . . . . ? 
C13 C14 C15 N5 -175.2(3) . . . . ? 
C11 N5 C15 C14 -141.1(3) . . . . ? 
C11 N5 C15 C16 41.4(5) . . . . ? 
C12 N6 C16 C15 -0.6(5) . . . . ? 
C14 C15 C16 N6 -1.5(5) . . . . ? 
N5 C15 C16 N6 176.0(3) . . . . ? 
 
_diffrn_measured_fraction_theta_max    0.988 
_diffrn_reflns_theta_full              24.99 
_diffrn_measured_fraction_theta_full   0.988 
_refine_diff_density_max    0.316 
_refine_diff_density_min   -0.478 
_refine_diff_density_rms    0.086 
